# Supplementary material
Source: Springer Nature journal article supplement (https://www.springermedizin.de/resource/supplementary/12936_2010_1591_MOESM4_ESM.pdf/9542328)

# Atovaquone

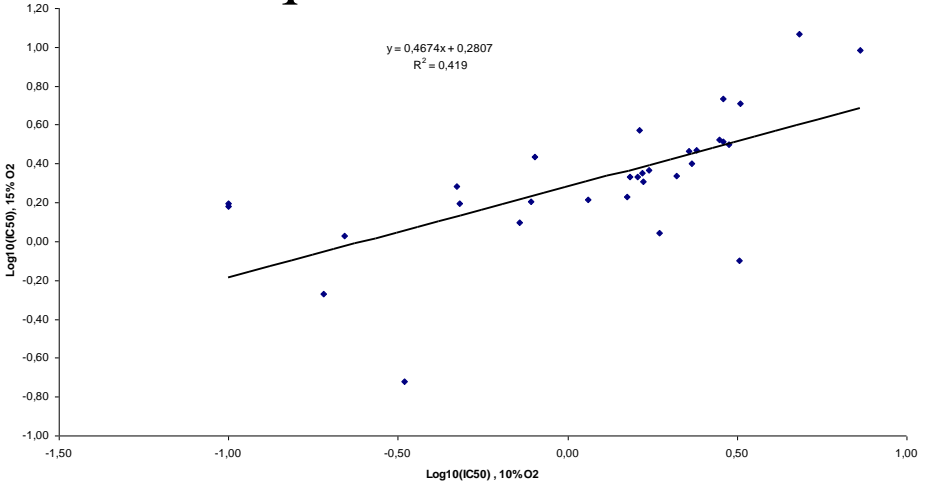

# Dihydroartemisinin

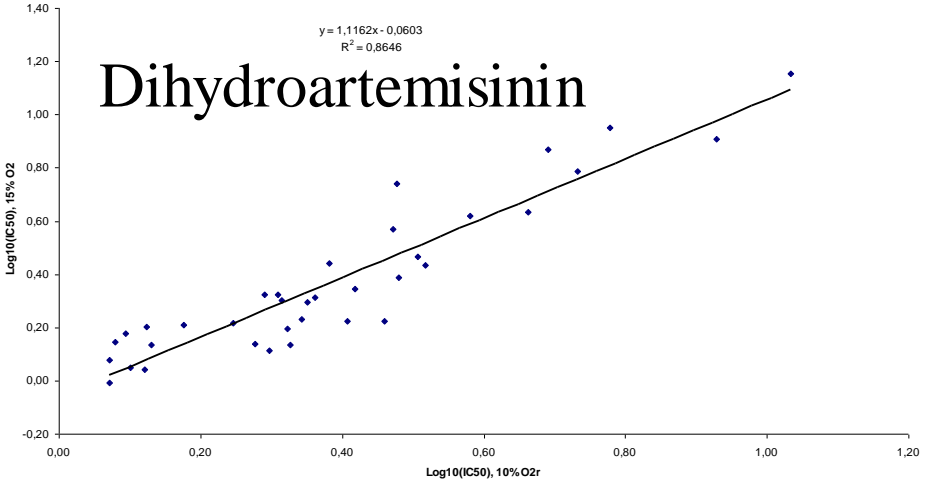

# Doxycycline

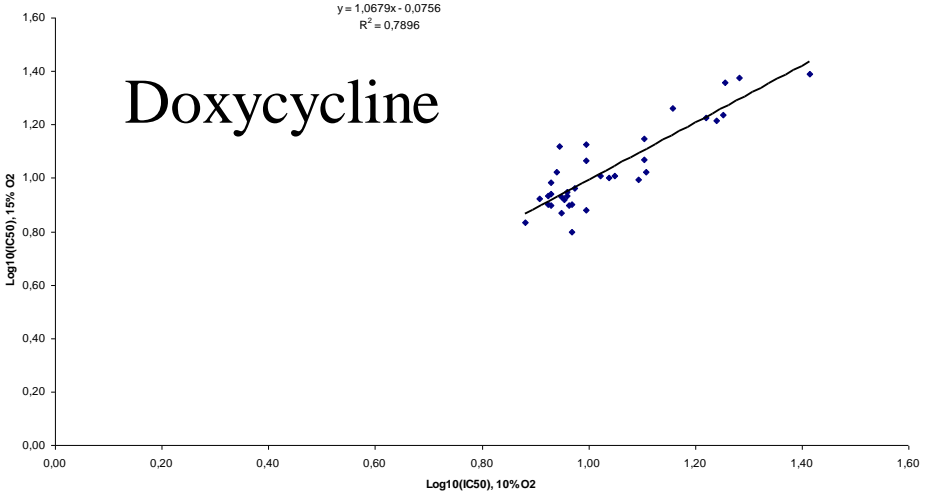

Supplement: MOESM4 [file 9542328]
